# Supplementary material
Source: Research Square preprint supplement (doi:10.21203/rs.3.rs-8062501/v1)
Supplement: Supplementary file 1 [file e9ea364e9362d7ba04c82fe7.docx]

**Prognostic Significance of Bile Acid Metabolism in Colorectal Cancer: An Integrative Multi-Omics, Single-Cell, and Spatial Analysis**

Hamideh Raeisia, Rozita Khodashahib, Mahsa Saeedi Niasarc, Samira Saghafid, Abbas Abdollahie, Amir Sadeghia, Hossein Safarpourb,f*

a Gastroenterology and Liver Diseases Research Centre, Research Institute for Gastroenterology and Liver Diseases, Shahid Beheshti University of Medical Sciences, Tehran, Iran

b Clinical Research Development Unit, Imam Reza Hospital, Faculty of Medicine, Mashhad University of Medical Sciences, Mashhad, Iran

c Basic and Molecular Epidemiology of Gastrointestinal Disorders Research Centre, Research Institute for Gastroenterology and Liver Diseases, Shahid Beheshti University of Medical Sciences, Tehran, Iran

d Student Research Committee, Faculty of Medicine, Mashhad University of Medical Sciences, Mashhad, Iran

e Endoscopic and Minimally Invasive Surgery Research Center, Mashhad University of Medical Sciences, Mashhad, Iran.

f Cellular and Molecular Research Center, Birjand University of Medical Sciences, Birjand, Iran

***Correspondence:**

Hossein Safarpour, Cellular and Molecular Research Center, Birjand University of Medical Sciences, Birjand, Iran. Email: [safarpour701@yahoo](mailto:H.safarpour@bums.ac.ir).com

|  |  |  |
| --- | --- | --- |
|  |  |  |
|  |  |  |

**Fig. S1:** Analysis of expression level of *ABCA8* gene in CRC patients according to different clinical parameters, including sex, age, tumor location, tumor differentiation, tumor stage, family history of cancer, tobacco consumption, defection, and history of chronic diseases. The mRNA expression of the indicated genes was assessed by RT-qPCR in a total of 30 patients with CRC (normalized to β-actin). Data are representative means ± SD of three independent experiments. A *P* value of <0.05 was considered as significant (**P* <0.05) using Mann-Whitney U test.

|  |  |  |
| --- | --- | --- |
|  |  |  |
|  |  |  |

**Fig. S2:** Analysis of expression level of *ABCD2* gene in CRC patients according to different clinical parameters, including sex, age, tumor location, tumor differentiation, tumor stage, family history of cancer, tobacco consumption, defection, and history of chronic diseases. The mRNA expression of the indicated genes was assessed by RT-qPCR in a total of 30 patients with CRC (normalized to β-actin). Data are representative means ± SD of three independent experiments. A *P* value of <0.05 was considered as significant (**P* <0.05) using Mann-Whitney U test.

**Table S1:** Characteristics of CRC subjects included in this research.

| **Variables** | **Patients (%)** |
| --- | --- |
| **Gender**  Male  Female |  |
| 20 (66.66%) |
| 10 (33.33%) |
| **Age**  Mean  Range |  |
| 58 ± 12.2 Years |
| 53.7±15.2 Years |
| **Tumor location**  Colon  Rectum |  |
| 21 (70%) |
| 9 (30%) |
| **TNM Stage**  I-II  III-IV |  |
| 20 (66.66%) |
| 10 (33.33%) |
| **Differentiation**  Well  Moderately + Poorly |  |
| 18 (60%) |
| 12 (40%) |
